# Supplementary material
Source: PubMed Central journal article supplement (PMC6087543)

## SUPPLEMENTAL MATERIALS

for

### **SLC45A2: A MELANOMA ANTIGEN WITH HIGH TUMOR SELECTIVITY AND REDUCED POTENTIAL FOR AUTOIMMUNE TOXICITY**

#### SUPPLEMENTAL FIGURE LEGENDS

**Figure S1. Ectopic expression of HLA allotypes in melanoma cell line Mel888.** Parental Mel888 cells were transduced to over-express either HLA-A\*0201 or HLA-A\*2402, stained with A\*0201- or A\*2402-specific antibodies, and analyzed by flow cytometry.

**Figure S2. SLC45A2 expression is restricted to melanoma tumor cells. (A)** SLC45A2 expression in non-melanoma tumor cell lines including colon cancer, breast cancer, prostate cancer, lung cancer and hematologic malignancies, as determined by RT-PCR analysis. **(B)** Summary of RT-PCR results showing SLC45A2, MART-1, PMEL, and tyrosinase expression in non-melanoma cell lines.

**Figure S3. SLC45A2 gene expression in Cancer Cell Line Encyclopedia (CCLE) cell lines.** Gene expression analysis in a diverse array of CCLE tumor cell lines shows SLC45A2 expression is melanoma tumor-specific.

**Figure S4. Quantitative comparison of SLC45A2 gene expression in various normal tissues and cancers.** RNAseq analysis derived from the GTex Portal and TCGA databases showing SLC45A2 transcript expression in normal tissues and various cancers, respectively. TPM, transcripts per million.

**Figure S5. Generation of HLA-A\*0201-restricted SLC45A2 antigen-specific CTLs from multiple normal donor PBMC. (A)** See Figure 3 legend for description of SLC45A2 antigen-specific T-cell generation. **(B)** Phenotype of SLC45A2-specific CTLs 14 days post-REP, as determined by CD45RA, CCR7, CD62L and CD28 staining and flow cytometry.

**Figure S6. SLC45A2-specific CTLs demonstrate lytic activity against uveal and mucosal melanoma cell lines.** (A) Expression analysis of MDAs SLC45A2, MART-1, PMEL and tyrosinase in 5 different uveal melanoma cell lines, as determined by RT-PCR. (B) Cytotoxic activity of SLC45A2-specific CTLs against HLA-A\*0201-positive or negative uveal melanoma cell lines. Cytotoxic activity of MART1- or PMEL-specific CTLs also was tested against these uveal cell lines. (C) Cytotoxic activity of SLC45A2-specific CTLs against HLA-A\*2402-positive or negative uveal melanoma cell lines. Significant killing is observed for OMM1 (HLA-A2+, SLC45A2+) uveal melanoma line, but not for HLA-A2-negative melanoma lines (92.1, 202, UPMD2). UPMD1 is an HLA-A2+ line with markedly reduced expression of SLC45A2, which is reflected in significantly lower lytic sensitivity. (D) Expression analysis of MDAs in 2 mucosal melanoma cell lines, as determined by RT-PCR. (E) Cytotoxic activity of SLC45A2-, MART1-, or PMEL-specific CTLs against HLA-A\*0201-positive or negative mucosal melanoma cell lines. All results show one representative experiment of at least 2 performed.

**Figure S7. IFN-gamma release by MDA-specific CTLs in response to titrated HLA-A\*0201 restricted peptides.** T2 cells pulsed with titrated concentrations of different MDA peptides were co-cultured with SLC45A2-, MART1-, or PMEL-specific CTLs. Forty-eight hours later, IFN- $\gamma$  concentration was measured by ELISA.

**Figure S8. Primary melanocytes express HLA-A\*0201 but are only killed by SLC45A2 T cells after peptide pulsing.** (A) Comparison of surface HLA-A\*0201 expression in Mel526, A375, and primary melanocytes 3C and 4C following staining with mAb BB7.2 and flow cytometric analysis. (B) Primary melanocyte lines 3C and 4C were pulsed with 1 $\mu$ g/ml SLYSYFQKV peptide and used as targets for HLA-A\*0201-restricted SLC45A2-specific CTLs in standard <sup>51</sup>Cr release assay.

**Figure S9. SLC45A2-specific CTLs from different donors preferentially kill melanoma tumor cells over primary melanocytes.** Results of standard <sup>51</sup>Cr release assay showing cytolytic activity of HLA-A\*0201-restricted SLC45A2-specific CTLs derived from 3 different PBMC donors against A\*0201-expressing Mel 526 (SLC45A2+), A375 (SLC45A2-), and two melanocyte cell lines (3C and 4C).

***SLC45A2: A melanoma tumor antigen  
with high tumor selectivity and  
reduced potential for autoimmune toxicity***

***SUPPLEMENTAL FIGURES AND TABLES***

**Supplemental Table S1.** Human MDA gene primer pair sequences used for RT-PCR.

| <b>Gene</b> | <b>Sense</b>               | <b>Anti-sense</b>          | <b>size</b> |
|-------------|----------------------------|----------------------------|-------------|
| SLC45A2     | CTGGCCGCCACATCTATAAAT      | GTAGCAGAACTCTCTTCCGAAC     | 125 bp      |
| MART-1      | ACAGTGATCCTGGGAGTCTTAC     | TTGAAGAGACACTTTGCTGTCC     | 168 bp      |
| gp100       | AGGTGCCTTTCTCCGTGAG        | GCTTCAGCCAGATAGCCACT       | 128bp       |
| Tyrosinase  | GCAAAGCATACCATCAGCTCA      | GCAGTGCATCCATTGACACAT      | 145bp       |
| GAPDH       | AAT CCC ATC ACC ATC TTC CA | TGG ACT CCA CGA CGT ACT CA | 94bp        |

**Supplemental Table S2.** SLC45A2-derived peptides detected by mass spectrometric analysis of melanoma cell lines.

| SLC45A2 peptide | Peptide position | Number of melanomas in which peptide was detected | HLA restriction element | Worldwide HLA prevalence | Predicted HLA binding affinity (nM) |
|-----------------|------------------|---------------------------------------------------|-------------------------|--------------------------|-------------------------------------|
| SLYSYFQKV       | 382 - 390        | 6                                                 | A*0201                  | 28%                      | 7                                   |
| RLLGTEFQV       | 209 - 217        | 8                                                 |                         |                          | 11                                  |
| SYIGLKGLYF      | 393 - 402        | 3                                                 | A*2402                  | 34%                      | 51                                  |
| VWFLSPILGF      | 73 - 82          | 2                                                 |                         |                          | 76                                  |
| ALIANPRRK       | 129 - 137        | 2                                                 | A*0301                  | 8%                       | 108                                 |
| SGQAGRHIY       | 5 - 13           | 2                                                 | A*3002                  | 3%                       | 41                                  |

**Supplemental Figure S1:** Ectopic expression of HLA allotypes in melanoma cell line Mel888.

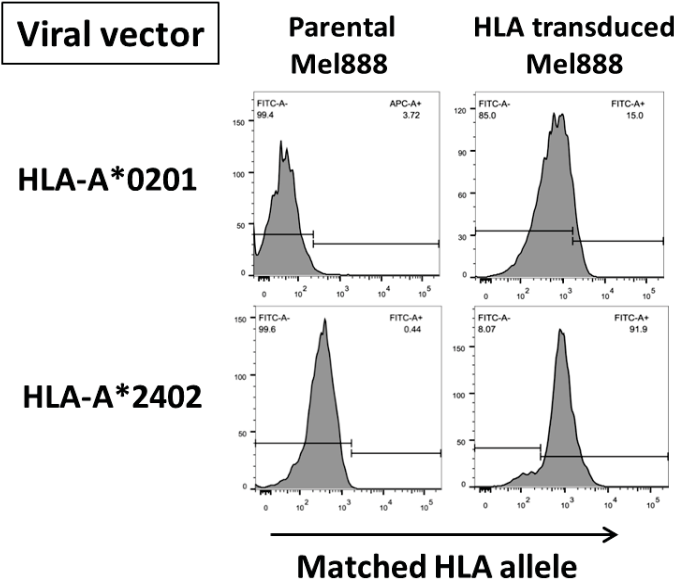

**Supplemental Table S3.** Confirmation of natural SLC45A2 peptide processing and presentation by HLA transduction.

| SLC45A2 peptide | HLA-transduced SLC45A2 <sup>+</sup><br>melanoma cell line<br>(Peptide ion score) |                  |                  | Predicted HLA-peptide<br>binding affinity<br>(nM) |        |         |
|-----------------|----------------------------------------------------------------------------------|------------------|------------------|---------------------------------------------------|--------|---------|
|                 | Mel888<br>PARENTAL                                                               | Mel888<br>A*0201 | Mel888<br>A*2402 | A*0101                                            | A*0201 | A*02401 |
| SLYSYFQKV       | -                                                                                | 20               | -                | 19814                                             | 7      | 12016   |
| RLLGTEFQV       | -                                                                                | 27               | -                | 21492                                             | 11     | 14058   |
| SYIGLKGLYF      | 34                                                                               | 23               | 61               | 12377                                             | 24841  | 51      |
| VWFLSPILGF      | -                                                                                | -                | 17               | 11843                                             | 18995  | 76      |

**Supplemental Figure S2:** SLC45A2 expression is restricted to melanoma tumor cells

**Non-melanoma cell line summary**

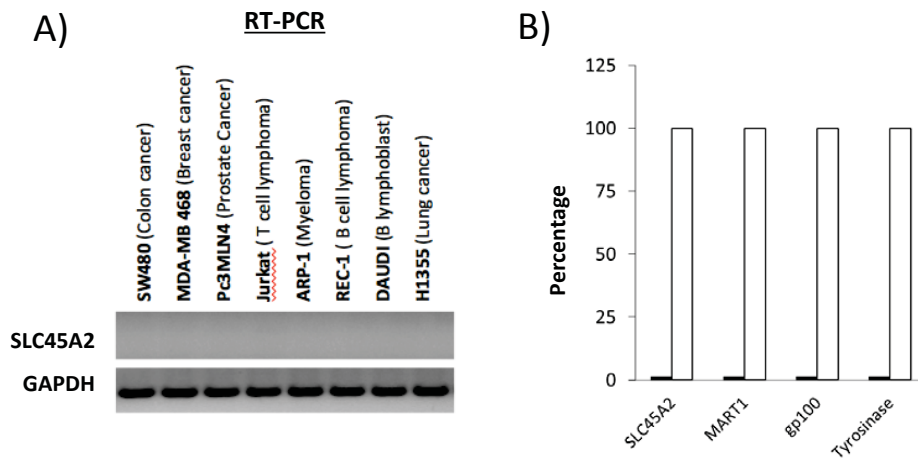



**Supplemental Figure S3:** SLC45A2 expression in Cancer Cell Line Encyclopedia (CCLE) cell lines.

### SLC45A2 transcript expression (microarray)

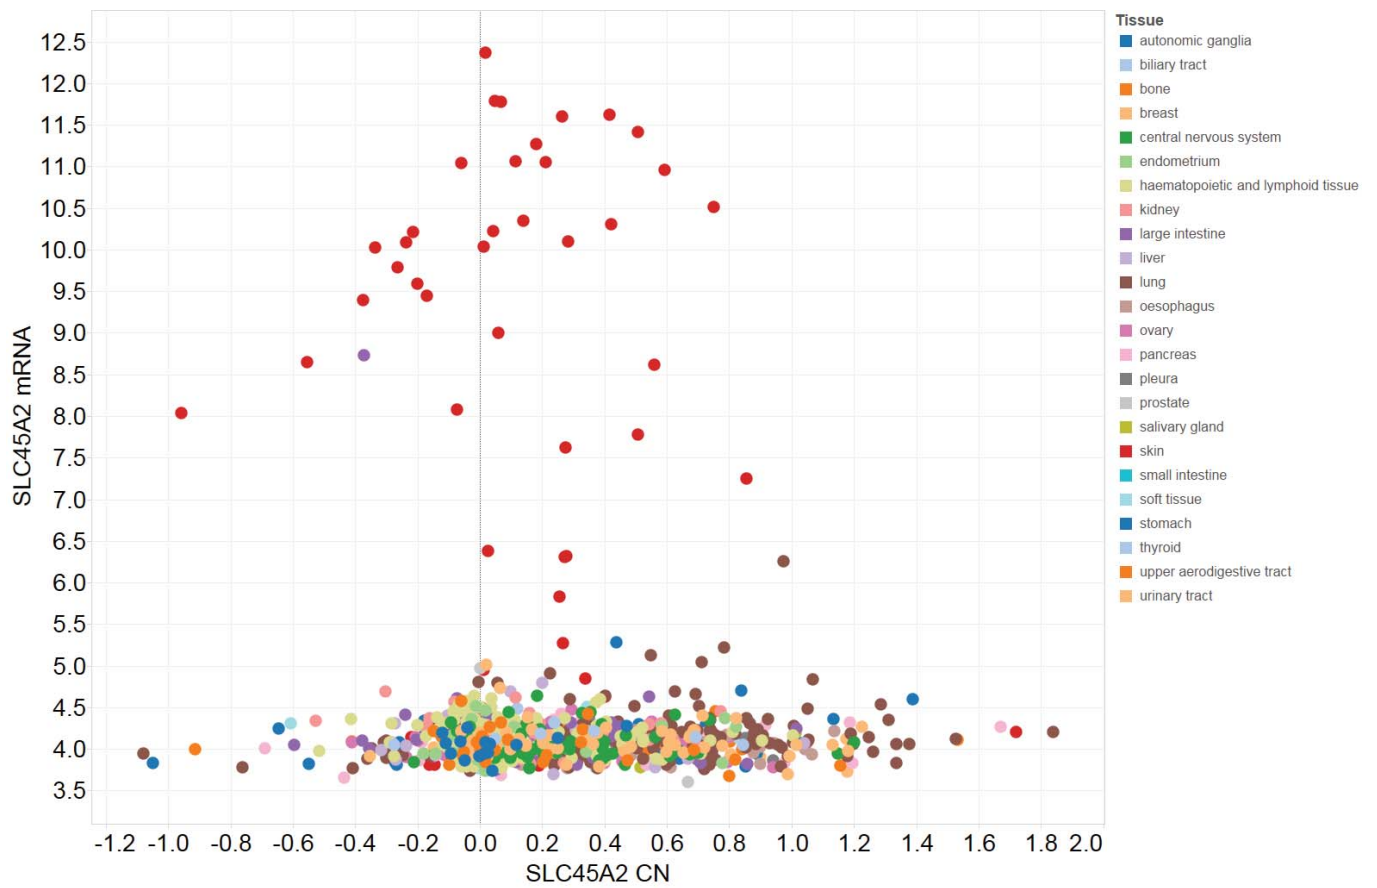

Supplemental Figure S4: Quantitative comparison of SLC45A2 gene expression in various normal tissues and cancers

### SLC45A2 mRNA transcript expression (RNAseq)

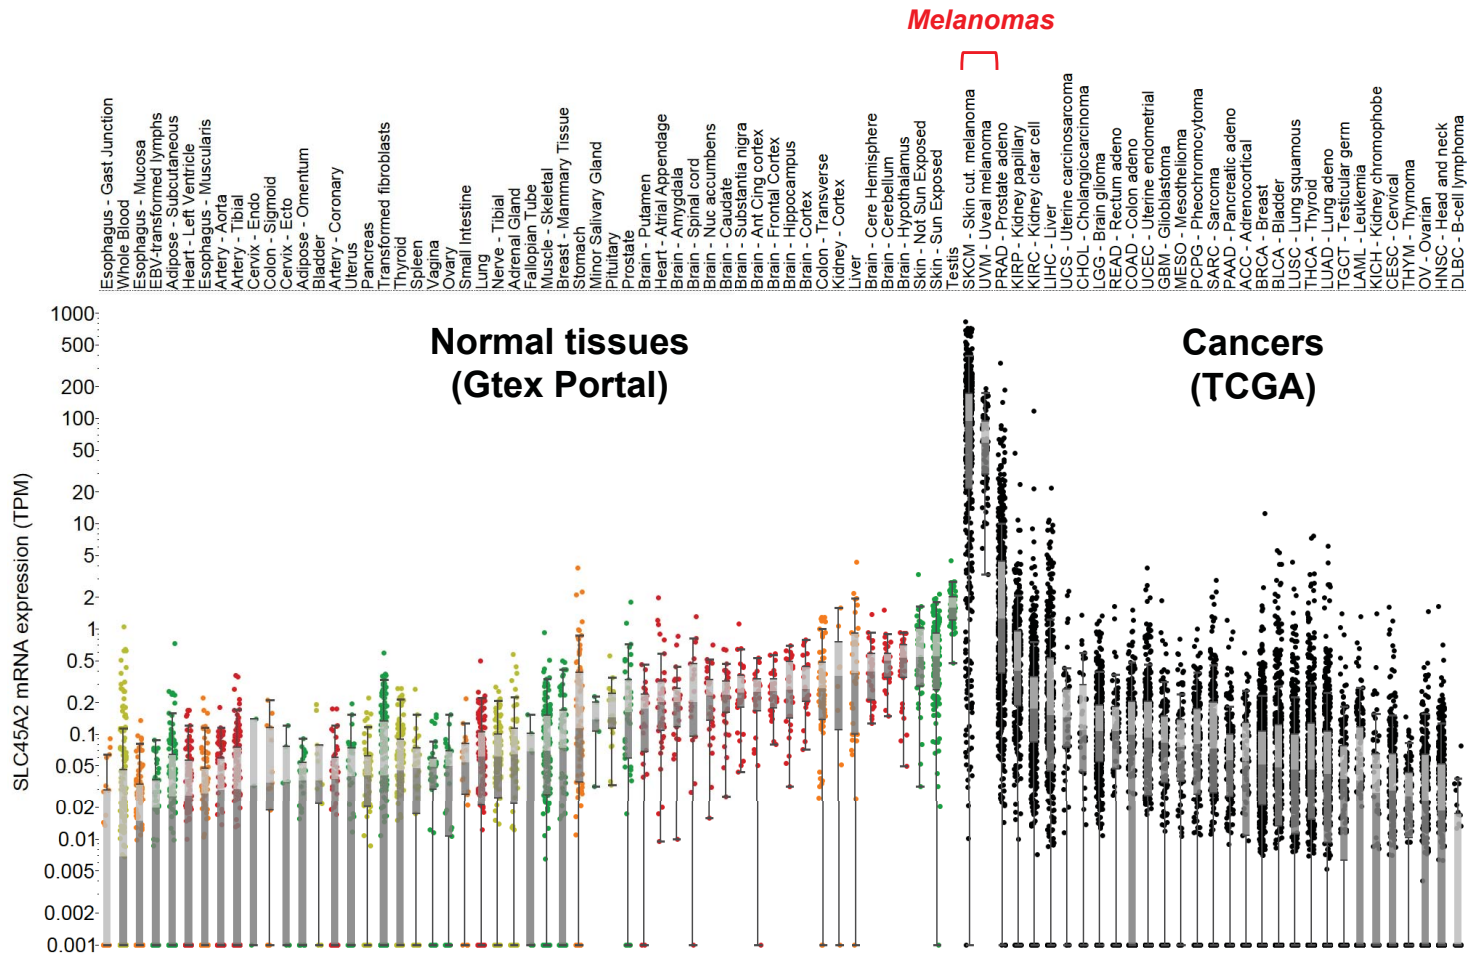

**Supplemental Figure S5:**

Generation of HLA-A\*0201-restricted SLC45A2 antigen-specific CTLs from multiple normal donor PBMC.

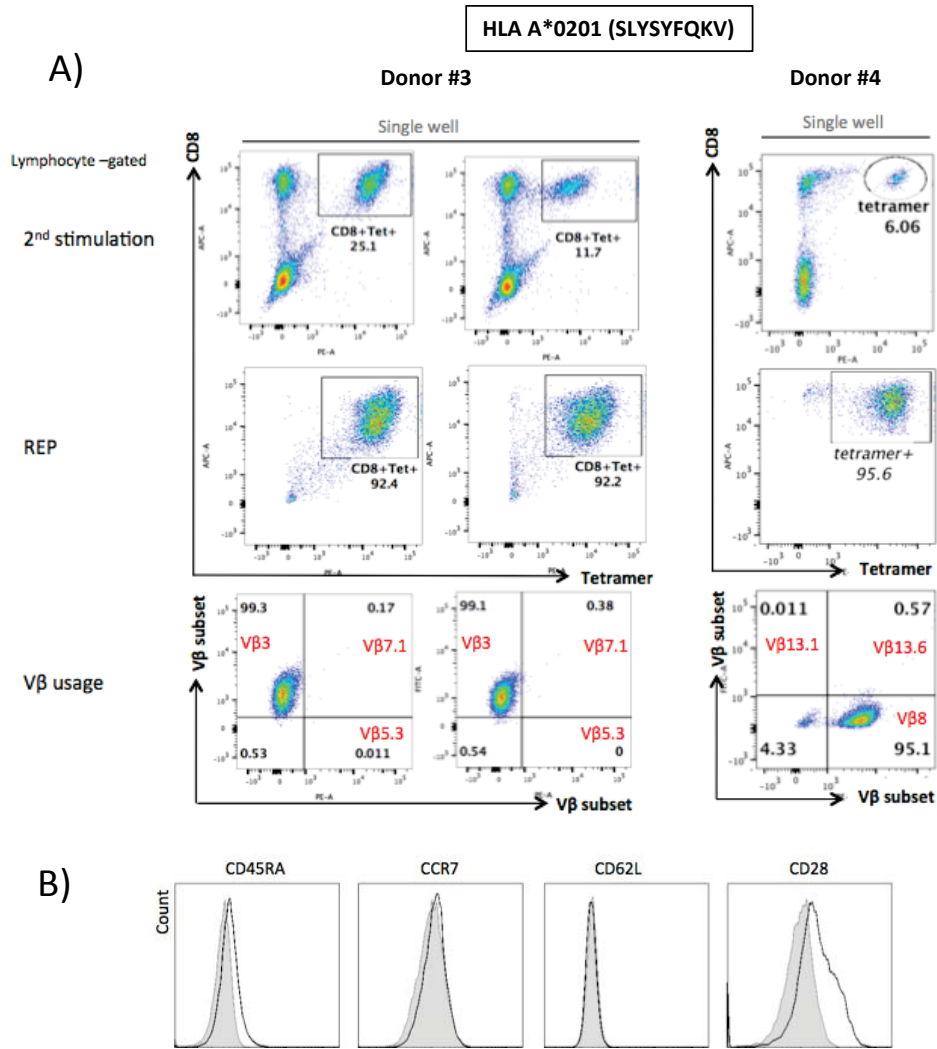

**Supplemental Figure S6: SLC45A2-specific CTL demonstrate lytic activity against uveal and mucosal melanoma cell lines.**

A)

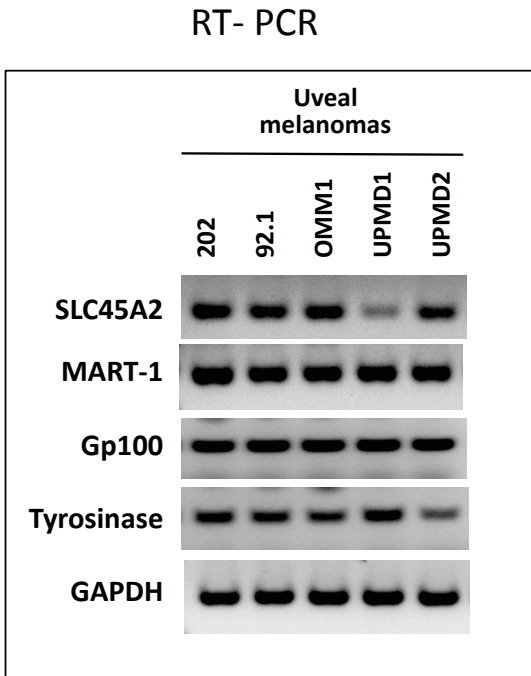

B)

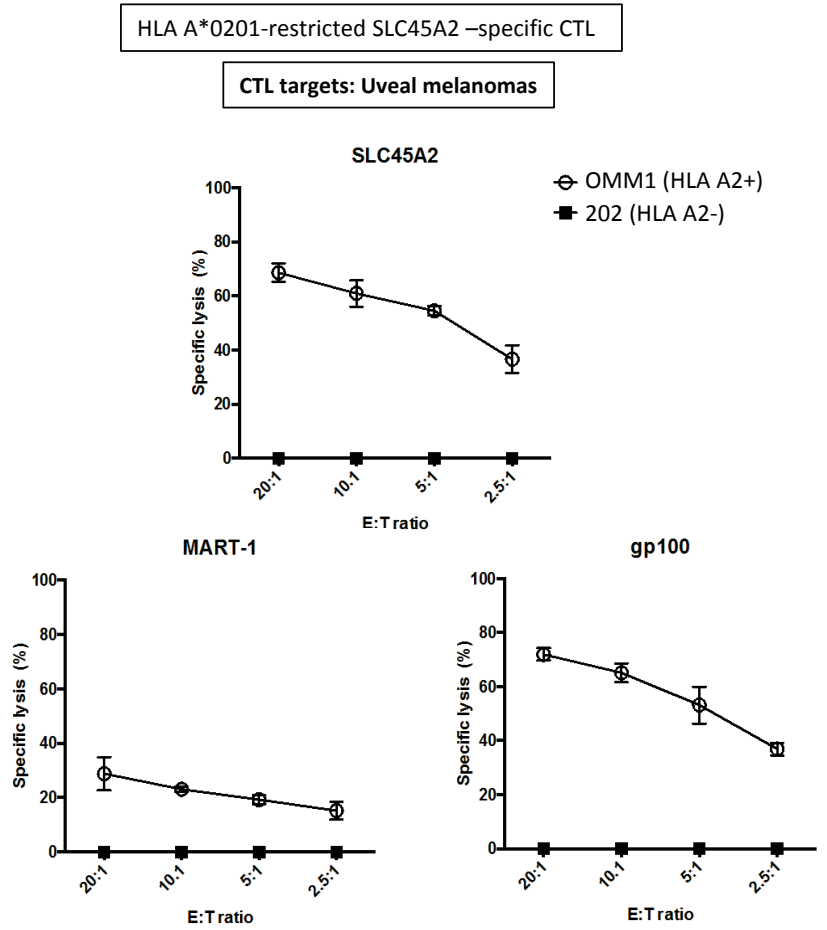

**Supplemental Figure S6: SLC45A2-specific CTL demonstrate lytic activity against uveal and mucosal melanoma cell lines.**

CTL targets: Uveal melanomas

C) HLA A\*0201-restricted SLC45A2 –specific CTL

D)

HLA A\*2402-restricted SLC45A2 –specific CTL

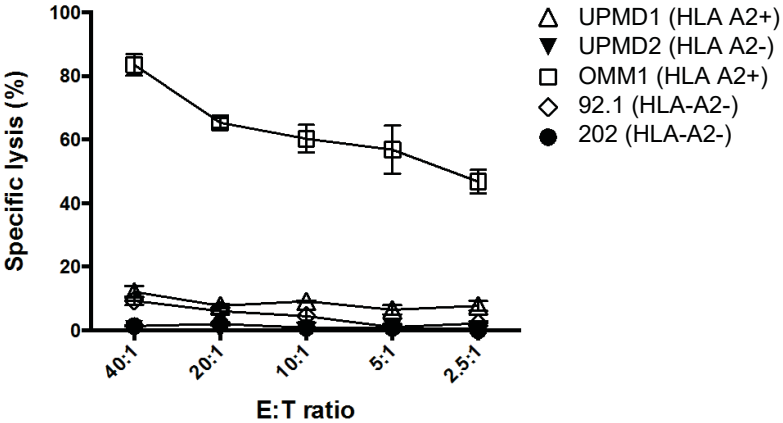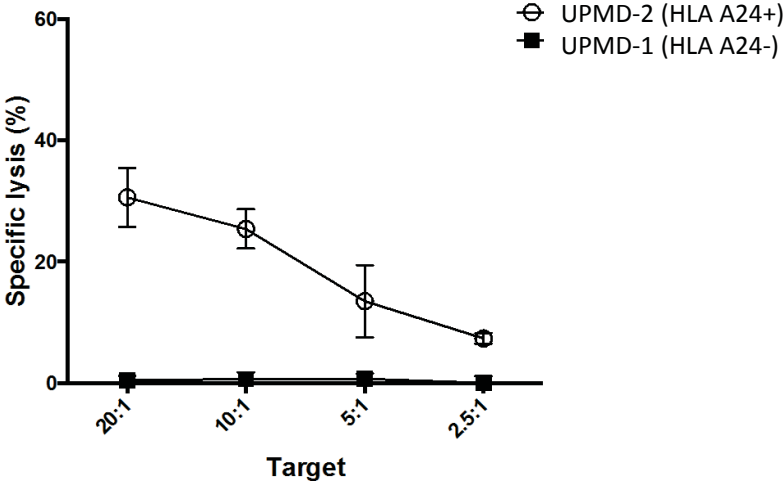

**Supplemental Figure S6: SLC45A2-specific CTL demonstrate lytic activity against uveal and mucosal melanoma cell lines.**

D)

RT- PCR

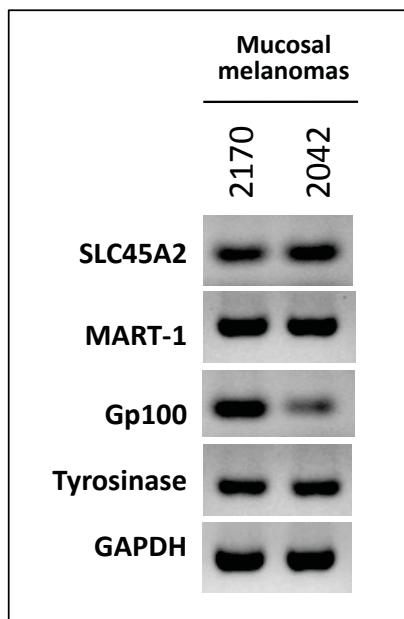

E)

HLA A\*0201-restricted SLC45A2 –specific CTL

CTL targets: Mucosal melanomas

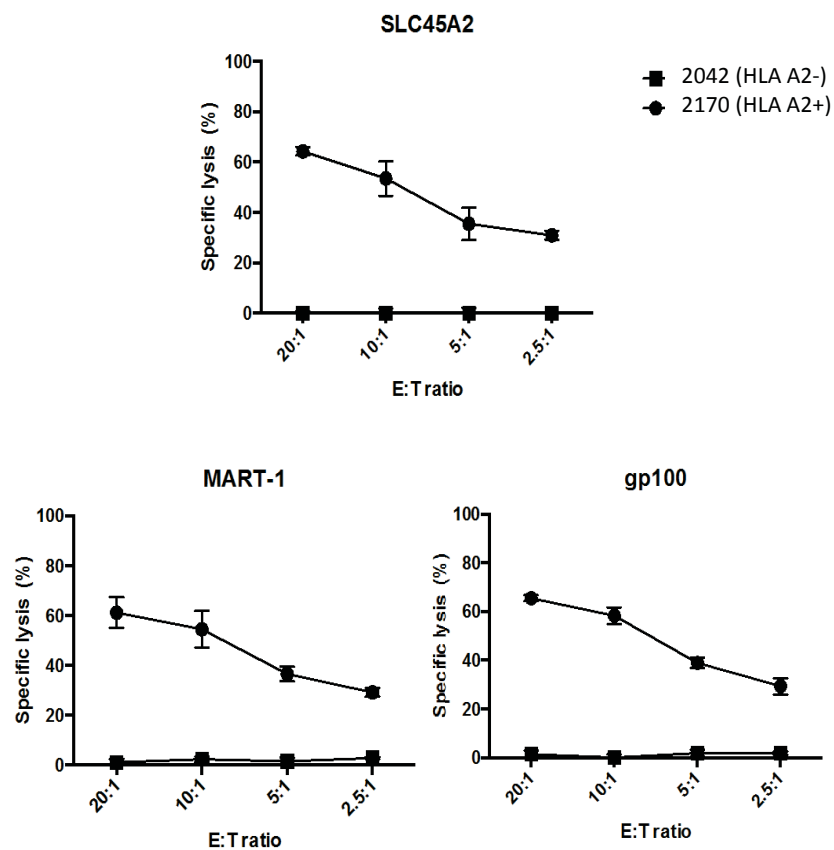

**Supplemental Figure S7:**

IFN-gamma release by MDA-specific CTL in response to titrated HLA-A\*0201 restricted MDA peptides.

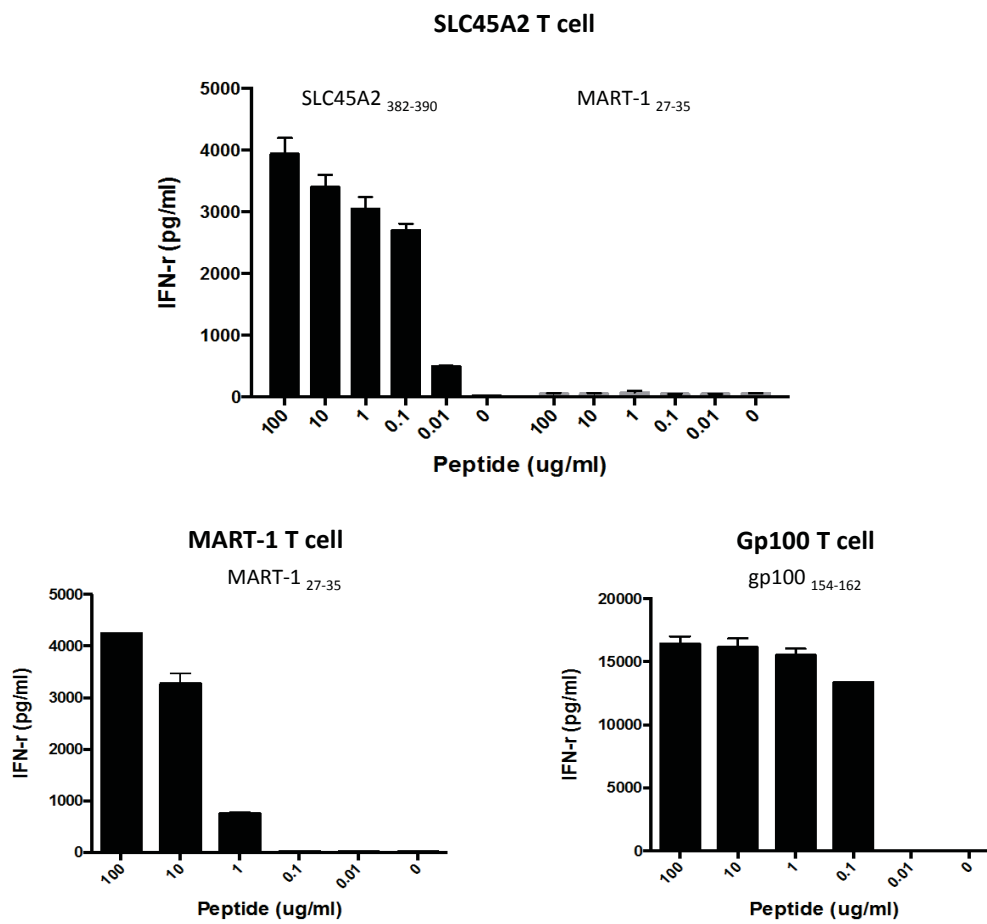

**Supplemental Table S4.** Sequences and predicted binding affinities of HLA-A2-restricted MDA peptides.

| <b>MDA Protein</b> | <b>Peptide position</b> | <b>Peptide seq</b> | <b>Affinity (nM)</b> | <b>HLA-type</b> |
|--------------------|-------------------------|--------------------|----------------------|-----------------|
| <b>SLC45A2</b>     | 382-390                 | <b>SLYSYFQKV</b>   | 7                    | HLA-A*0201      |
| <b>gp100</b>       | 154-162                 | <b>KTWGQYWQV</b>   | 9                    | HLA-A*0201      |
| <b>MART-1</b>      | 27-35                   | <b>AAGIGILTV</b>   | 2498                 | HLA-A*0201      |



**Supplemental Figure S8:**

Primary melanocytes express HLA-A\*0201 but are only killed by SLC45A2 T cells after peptide pulsing.

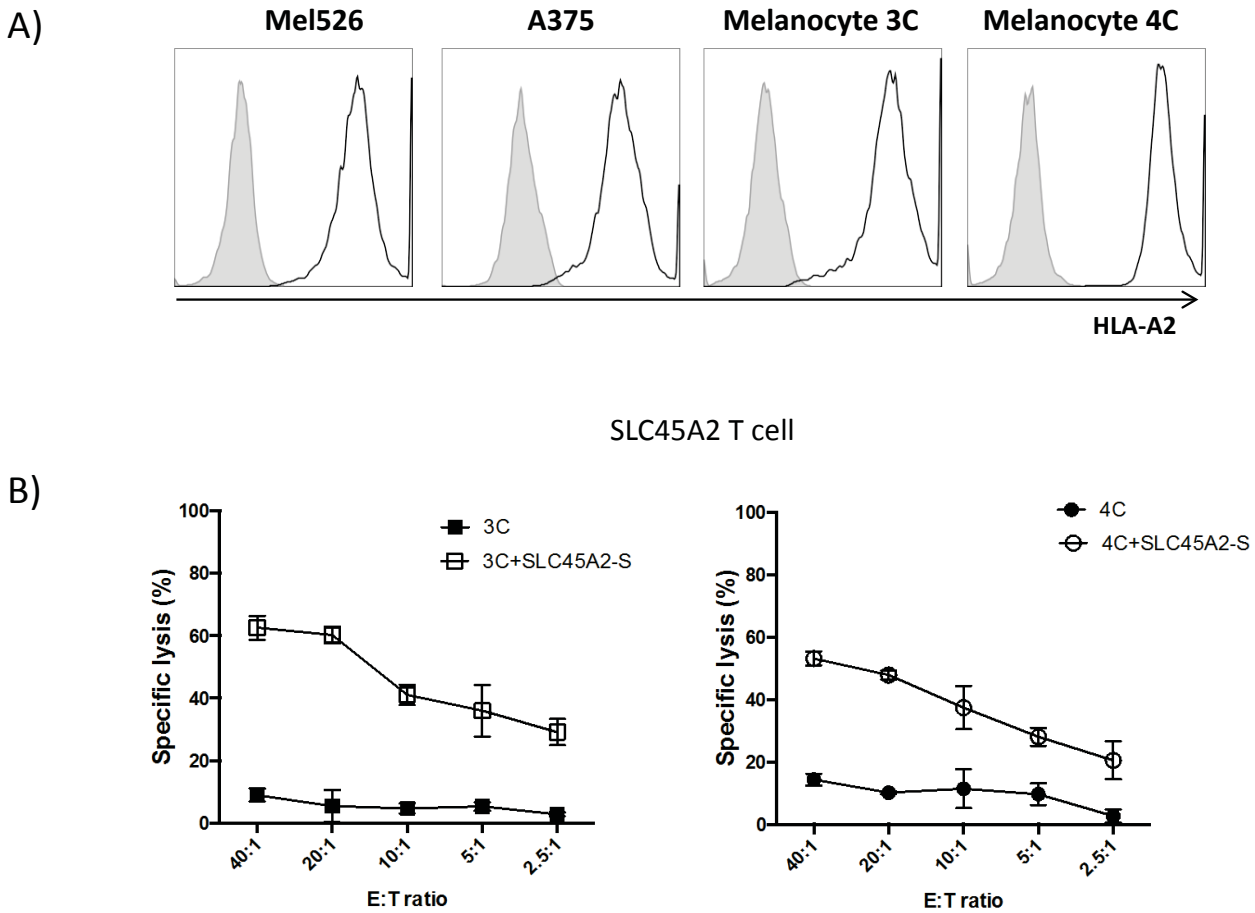

**Supplemental Figure S9:**

SLC45A2-specific CTLs from different donors kill melanoma tumor cells preferentially over primary melanocytes.

HLA A\*0201 restricted SLC45A2 –specific CTL

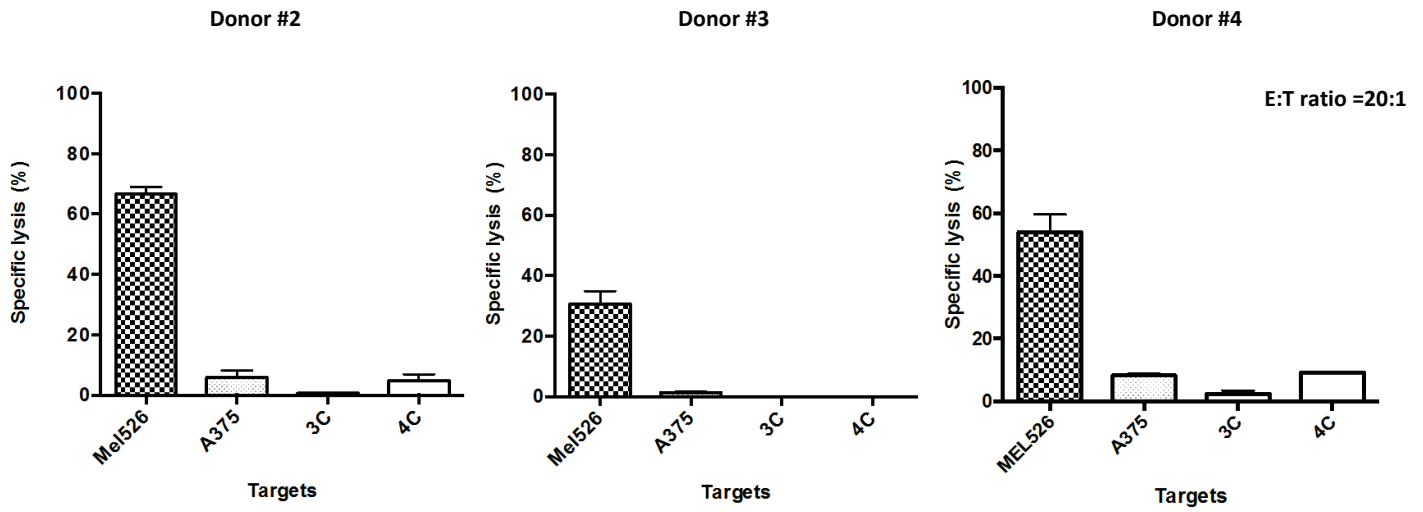

Supplement: NIHMS980623-supplement-Supplemental.pdf [file NIHMS980623-supplement-Supplemental.pdf]
